# Supplementary material for: Zinc-finger protein p52-ZER6 accelerates colorectal cancer cell proliferation and tumour progression through promoting p53 ubiquitination
Source: PubMed Central journal article supplement — eBioMedicine. 2019 Sep 11;48:248–63. doi: 10.1016/j.ebiom.2019.08.070 (PMC6838388; doi:10.1016/j.ebiom.2019.08.070), 2019-09-11
Supplement: mmc1.pdf [file mmc1.pdf]

# **Supplementary Material**

## **Zinc-finger protein p52-ZER6 accelerates colorectal cancer cell proliferation and tumour progression through promoting p53 ubiquitination**

Can Huang, Shourong Wu, Wenfang Li, Arin Herkilini, Makoto Miyagishi, Hezhao Zhao,  
Vivi Kasim\*

\*Email: [vivikasim@cqu.edu.cn](mailto:vivikasim@cqu.edu.cn) (V.K.)

## Supplementary Figure S1

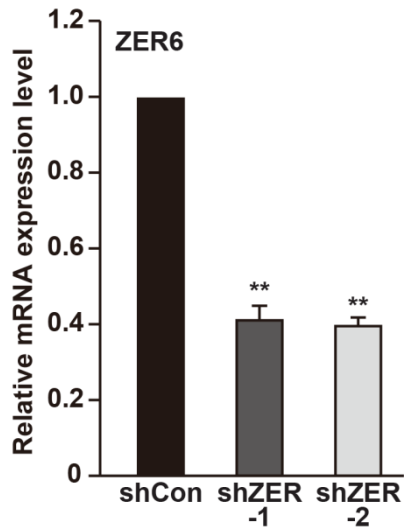

**Fig. S1. The efficacy of shRNA expression vectors targeting ZER6.** ZER6 mRNA expression level in HCT116 cells transfected with shRNA expression vectors targeting different sites of ZER6, as determined using quantitative RT-PCR (qPCR). Cells transfected with control vector (shCon) were used as control.  $\beta$ -Actin was used for qPCR normalization. Data were shown as mean  $\pm$  SEM of three independent experiments. \*\* $P < 0.01$  (ANOVA).

## Supplementary Figure S2

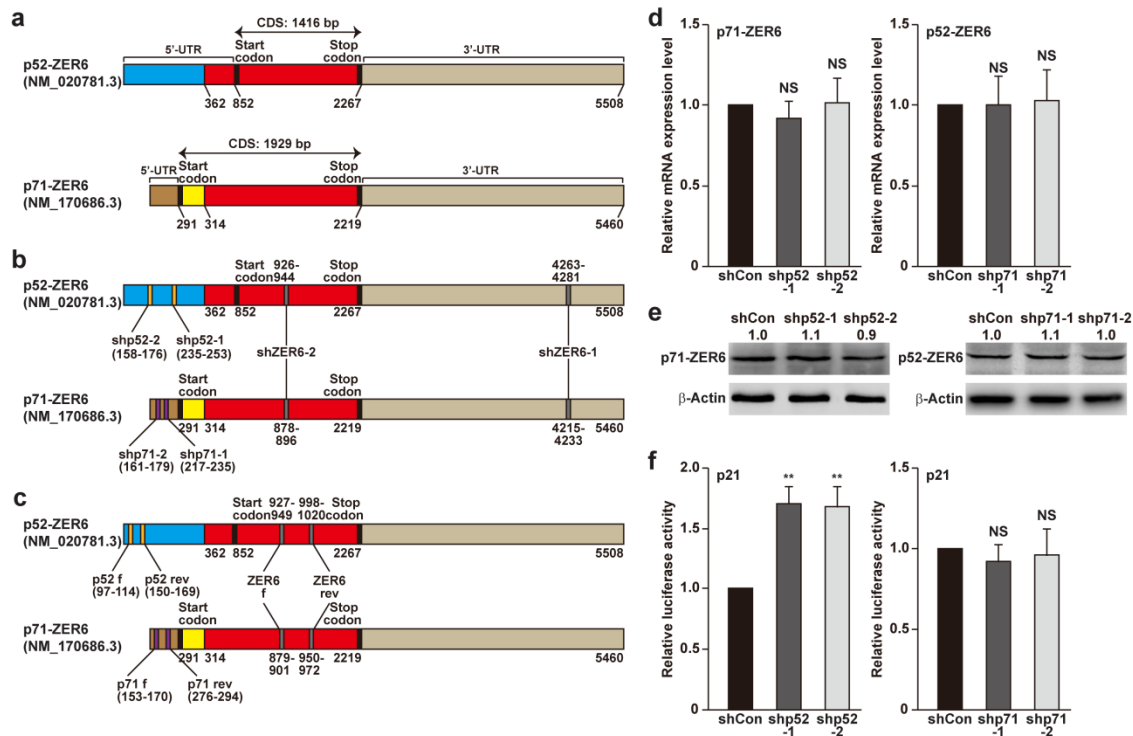

**Fig. S2. p52-ZER6 regulates p21 transcriptional activity.** **a** Schematic diagram of the nucleotide sequences of ZER6 isoforms mRNA. Homologous sequences were shown in same colours. **b** Schematic diagram of the shRNA target sites targeting the whole ZER6, and shRNA target sites specifically targeting p52-ZER6 and p71-ZER6. **c** Schematic diagram of the location of qPCR primer pairs for detection of the whole ZER6, and for specific detections of p52-ZER6 and p71-ZER6. **d** p71-ZER6 mRNA expression level in p52-ZER6-silenced HCT116 cells (left); and p52-ZER6 mRNA expression level in p71-ZER6-silenced HCT116 cells (right), as determined using qPCR. **e** p71-ZER6 protein expression level in p52-ZER6-silenced HCT116 cells (left); and p52-ZER6 protein expression level in p71-ZER6-silenced HCT116 cells (right), as determined using western blotting. **f** Activity of p21 reporter in p52-ZER6- (left) and p71-ZER6-silenced HCT116 cells (right), as determined using dual luciferase assay. Cells transfected with control vector (shCon) were used as control. β-Actin was used for qPCR normalization. Data were shown as mean ± SEM of three independent experiments. \*\* $P < 0.01$ ; NS: not significant (ANOVA).

## Supplementary Figure S3

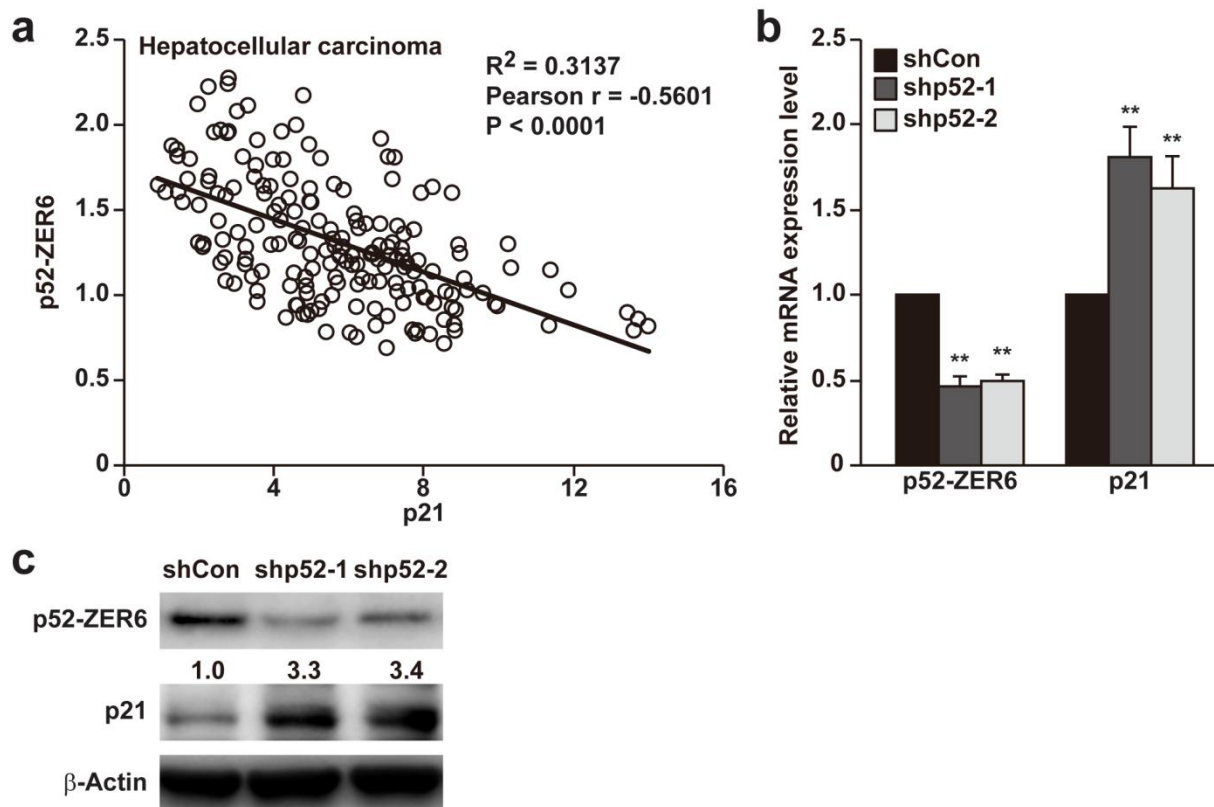

**Fig. S3. p52-ZER6 expression is negatively correlated with p21.** **a** Correlation analysis of ZER6 and p21 in hepatocellular carcinoma specimens (GEO data set: GSE25097,  $n = 184$ ). **b** p52-ZER6 and p21 mRNA expression levels in *p52-ZER6*-silenced HCT116 stable cell lines HCT116/shp52-1 and HCT116/shp52-2, as determined using qPCR. **c** p52-ZER6 and p21 protein expression levels in *p52-ZER6*-silenced HCT116 stable cell lines HCT116/shp52-1 and HCT116/shp52-2, as analysed using western blotting. The stable cell lines were obtained using two shRNA expression vectors targeting different sites of p52-ZER6 (shp52-1 and shp52-2), and were established from single clones. Stable cell line obtained using control vector (shCon) was used as control.  $\beta$ -Actin was used for qPCR normalization and as western blotting loading control. Quantitative data were shown as mean  $\pm$  SEM of three independent experiments. \*\* $P < 0.01$  (ANOVA).

## Supplementary Figure S4

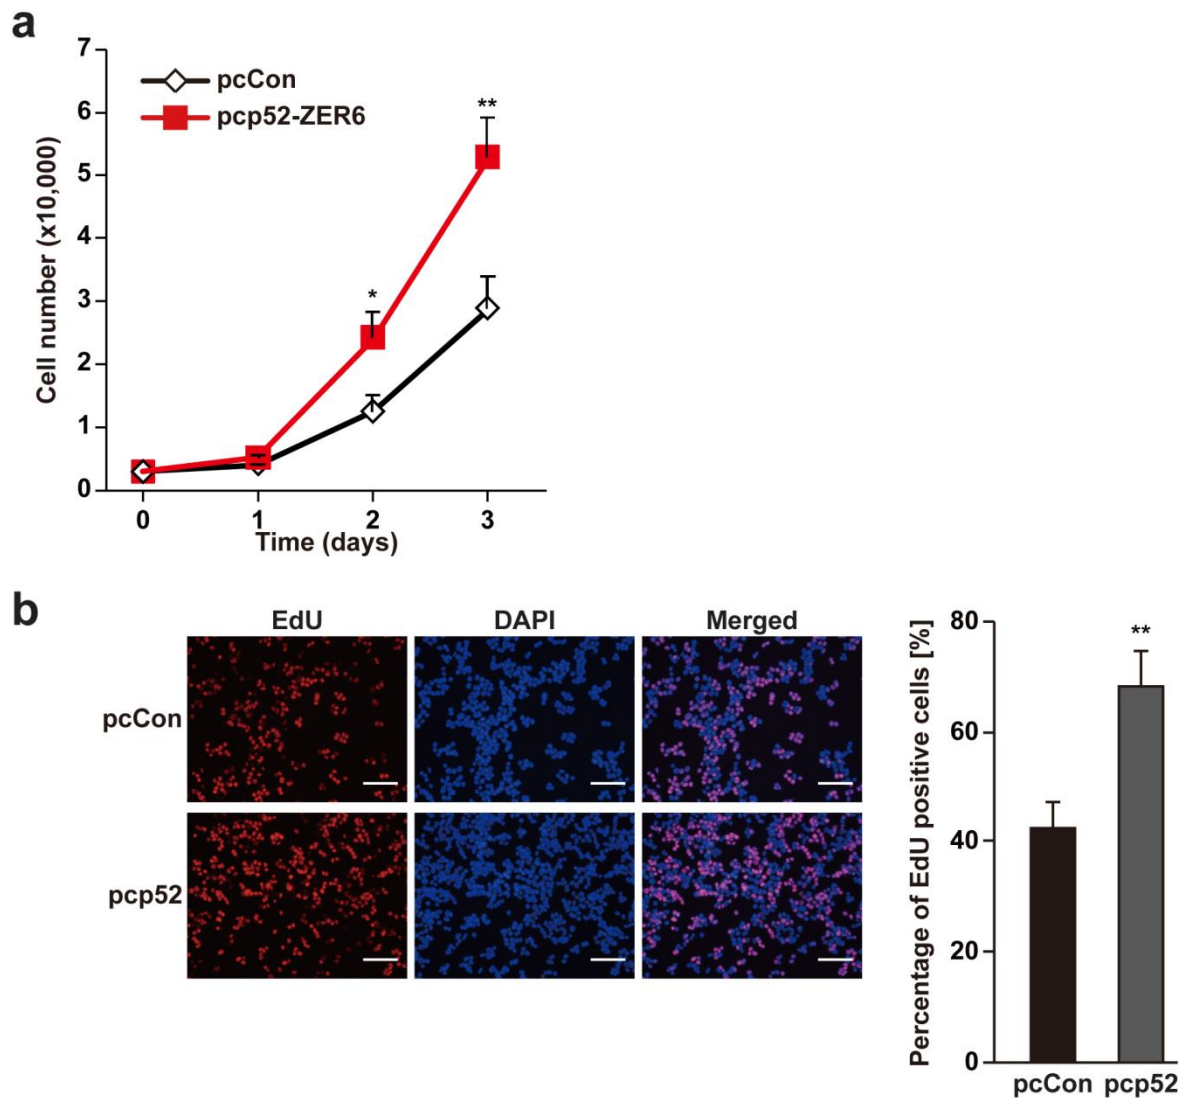

**Fig. S4. *p52-ZER6* overexpression enhances tumor cells proliferation.** **a** Total cell number of HCT116 cells overexpressing *p52-ZER6* at the indicated time points. **b** Number of proliferative HCT116 cells overexpressing *p52-ZER6*, as determined by the EdU incorporation assay. Representative images (left) and the percentage of EdU-positive cells to DAPI positive cells (right) were shown. Quantitative data were shown as mean  $\pm$  SEM of three independent experiments. \* $P < 0.05$ ; \*\* $P < 0.01$  (ANOVA); pcp52: *p52-ZER6* overexpression vector.

## Supplementary Figure S5

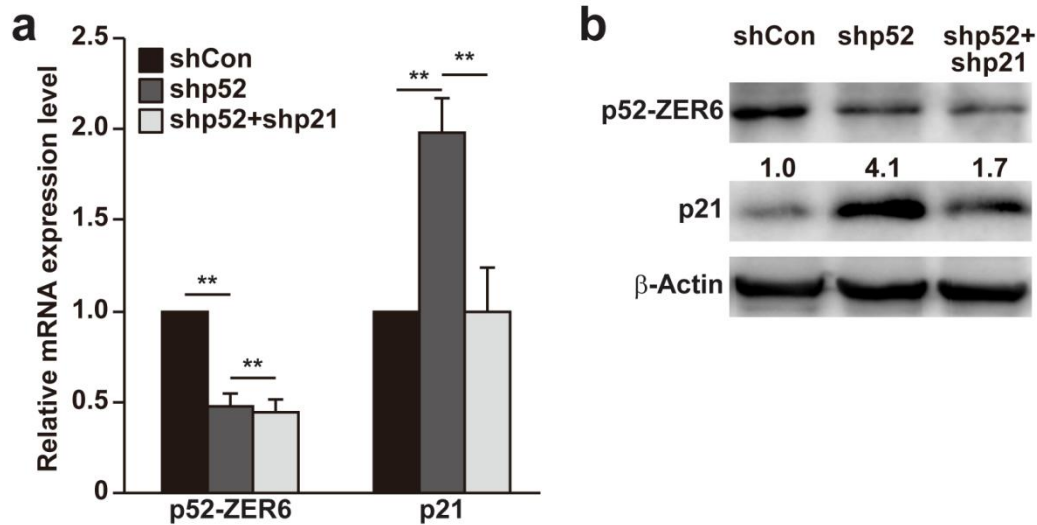

**Fig. S5. Establishment of the *p52-ZER6* and *p21* double-knockdown system.** **a** *p52-ZER6* and *p21* mRNA expression levels in HCT116 cells transfected with both shRNAs targeting *p52-ZER6* and *p21*, as determined using qPCR. **b** *p52-ZER6* and *p21* protein expression levels in HCT116 cells transfected with both shRNAs targeting *p52-ZER6* and *p21*, as analysed using western blotting. Cells transfected with control vector (shCon) were used as controls.  $\beta$ -Actin was used for qPCR normalization and as western blotting loading control. Quantitative data were shown as mean  $\pm$  SEM of three independent experiments.  $**P < 0.01$  (ANOVA).

## Supplementary Figure S6

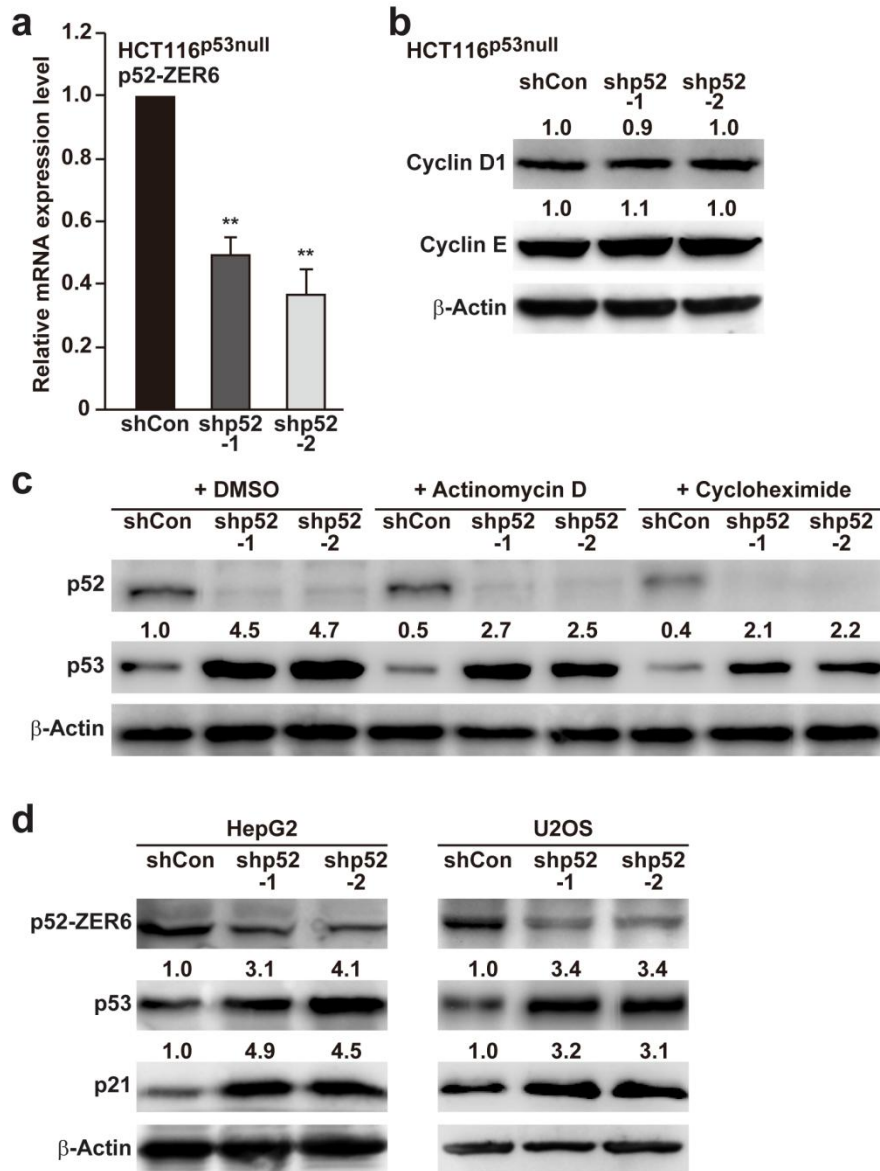

**Fig. S6. p52-ZER6 suppresses p21 expression level through p53 post-translational regulation.** **a** p52-ZER6 mRNA expression level in HCT116<sup>p53null</sup> cells transfected with shRNA vectors targeting *p52-ZER6*, as determined using qPCR. **b** The protein expression levels of cyclin D1 and cyclin E in HCT116<sup>p53null</sup> cells transfected with shRNA vectors targeting *p52-ZER6*, as determined using western blotting. **c** p53 protein expression level in *p52-ZER6* silenced HCT116 cells treated with transcriptional inhibitor actinomycin D, or *de novo* protein synthesis inhibitor cycloheximide (30 μg/ml), as analysed using western blotting. Cells treated with DMSO were used as control. **d** p53 and p21 protein expression levels in *p52-ZER6*-silenced human HepG2 hepatocellular carcinoma cell line (left) and human U2OS sarcoma cell line (right), as analysed using western blotting. β-Actin was used for qPCR normalization and as western blotting loading control. Cells transfected with shCon were used as control. Quantitative data were shown as mean ± SEM of three independent experiments. \*\**P* < 0.01 (ANOVA).

## Supplementary Figure S7

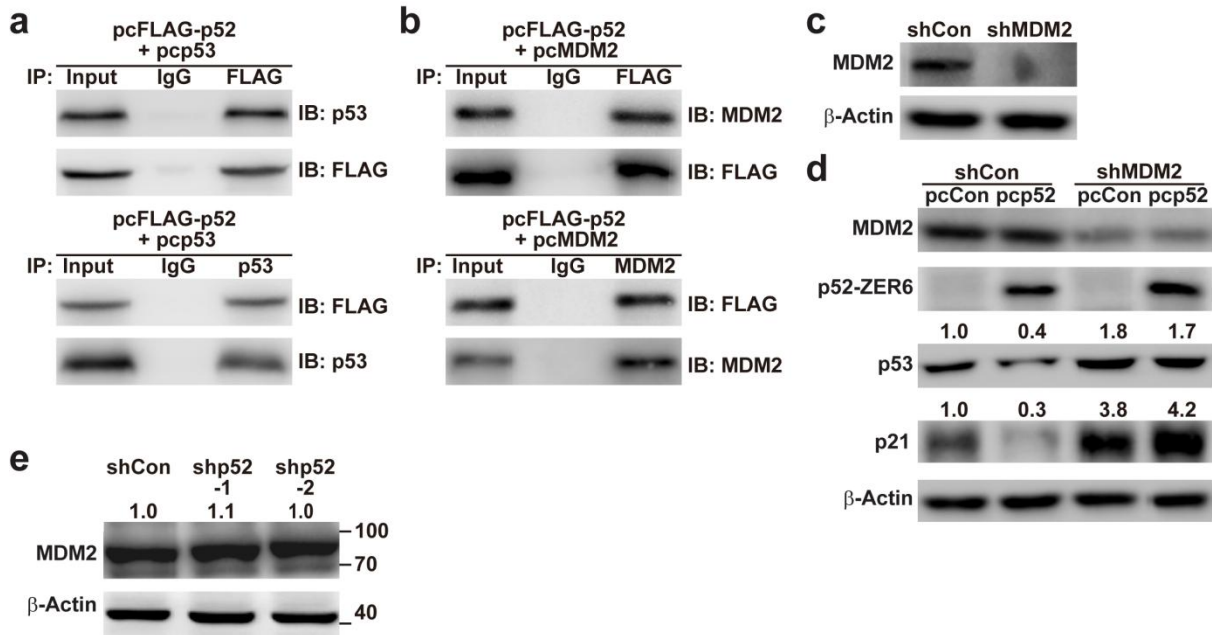

**Fig. S7. MDM2 is necessary for p52-ZER6 regulation on p53 protein accumulation.** **a–b** Physical interactions between p52-ZER6 and p53 (a) or MDM2 (b) in HCT116 cells overexpressing *p52-ZER6* and *p53* or *MDM2*, as determined by anti-p53 or anti-MDM2 immunoblotting of cell lysate immunoprecipitated with anti-FLAG antibody, and *vice versa*. **c** Protein expression level of MDM2 in *MDM2*-silenced HCT116 cells, as determined using western blotting. **d** p53 and p21 protein expression levels in *MDM2*-silenced HCT116 cells overexpressing *p52-ZER6*, as analysed using western blotting. **e** MDM2 protein expression level in *p52-ZER6*-silenced HCT116 cells, as determined using western blotting. β-Actin was used as western blotting loading control.



## Supplementary Figure S8

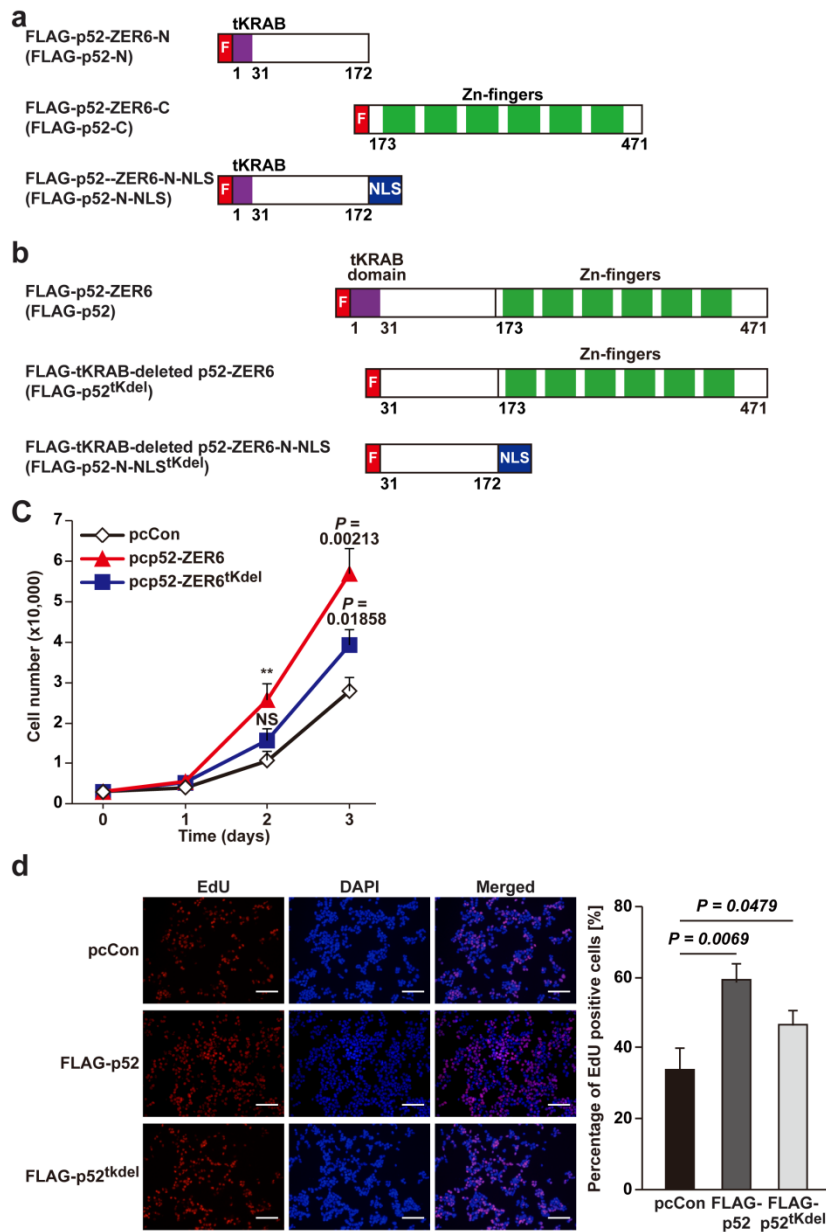

**Fig. S8. The role of tKRAB domain in p52-ZER6-mediated tumour cells proliferation. a** Schematic diagram of the FLAG-conjugated N terminal and C terminal fragments of p52-ZER6 (FLAG-p52-N and FLAG-p52-C, respectively), and NLS-fused N terminal fragment of p52-ZER6 (FLAG-p52-N-NLS). **b** Schematic diagram of FLAG-conjugated p52-ZER6 fragment lacking tKRAB domain (FLAG-p52<sup>tKdel</sup>) and NLS-fused N terminal fragment of p52-ZER6 lacking tKRAB domain (FLAG-p52-N-NLS<sup>tKdel</sup>). **c** Total cell number of HCT116 cells overexpressing *FLAG-p52<sup>tKdel</sup>* at the indicated time points. **d** Number of proliferative HCT116 cells overexpressing *p52<sup>tKdel</sup>*, as determined by the EdU incorporation assay. Representative images (left) and the percentage of EdU-positive cells to DAPI positive cells (right) were shown. Quantitative data were shown as mean  $\pm$  SEM of three independent experiments. \*\* $P < 0.01$ ; NS: not significant;  $P$  values were analysed using ANOVA.

## Supplementary Figure S9

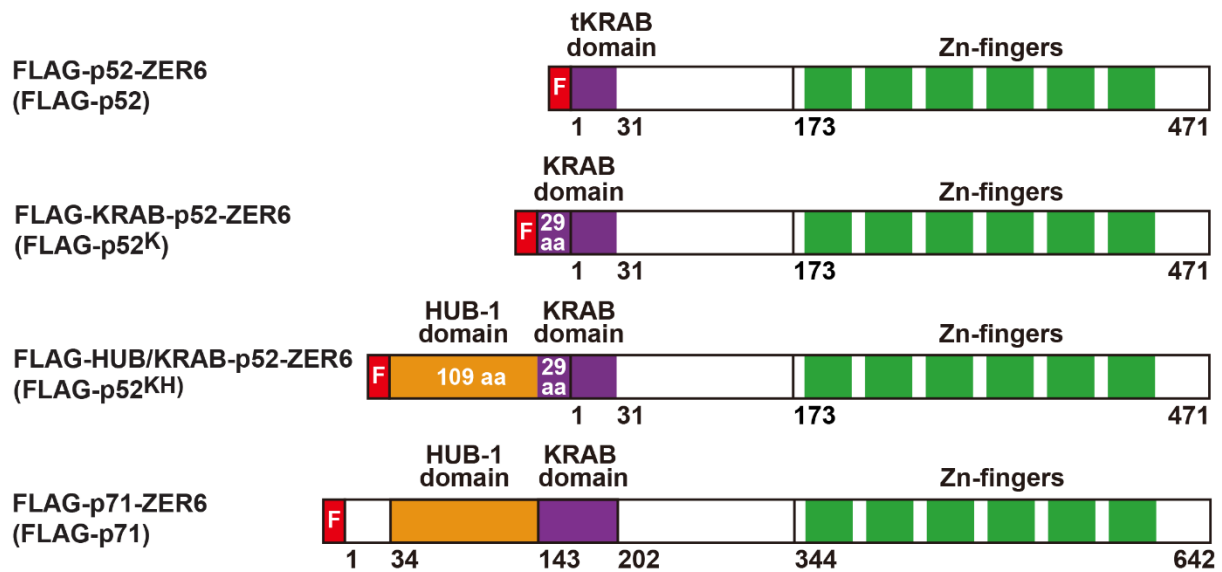

**Fig. S9. Schematic diagram of various p52-ZER6 and p71-ZER6 fragments.** Schematic diagram of various fragments with intermediate length and sequences between p52-ZER6 and p71-ZER6 conjugated with FLAG: FLAG-p52-ZER6, FLAG-KRAB-p52-ZER6 (FLAG-p52<sup>K</sup>), FLAG-HUB-1/KRAB-p52-ZER6 (FLAG-p52<sup>KH</sup>) and FLAG-p71-ZER6. F: FLAG.

## Supplementary Figure S10

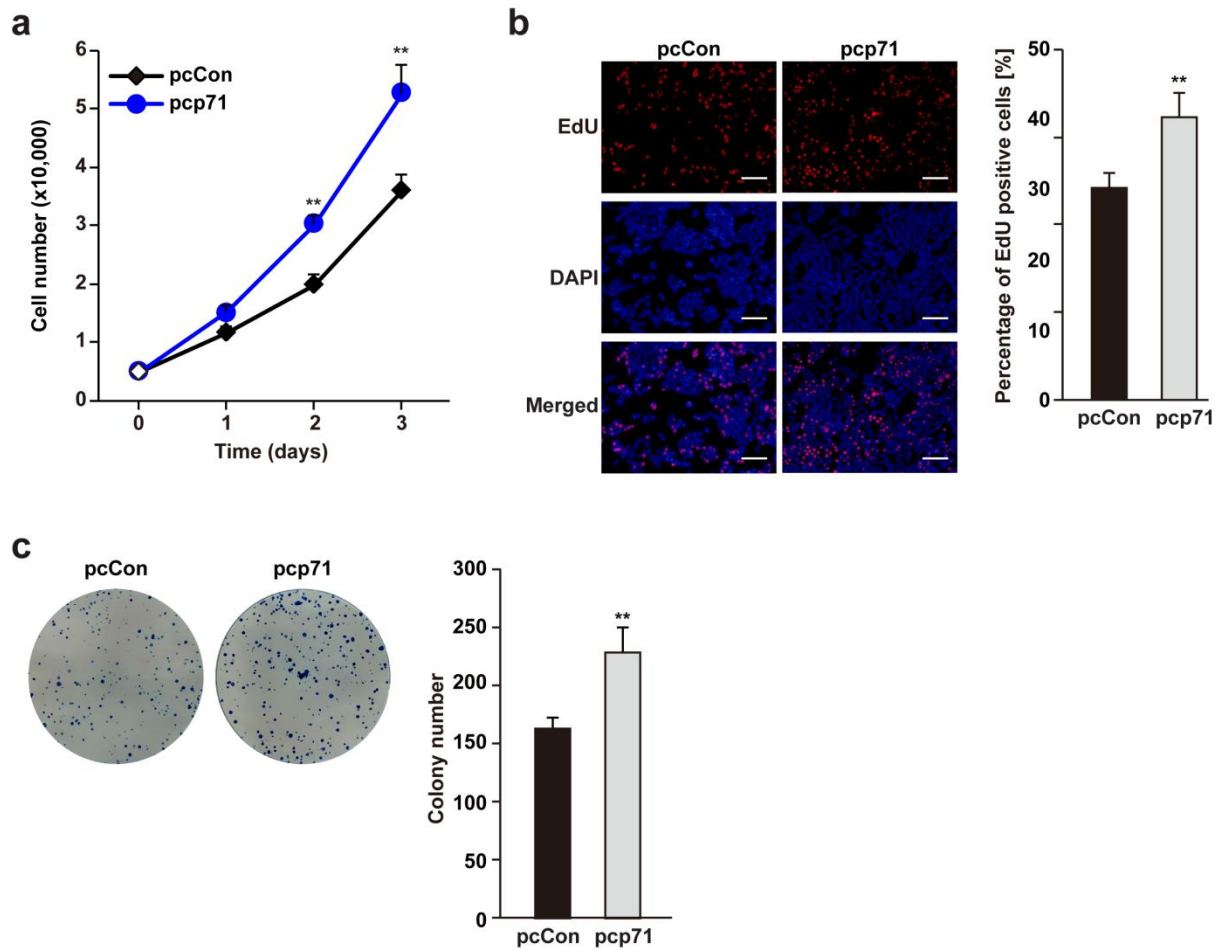

**Fig. S10. p71-ZER6 enhances cell proliferation and colony formation potentials.** **a** Total cell number of HCT116 cells overexpressing *p71-ZER6* at the indicated time points. **b** Number of proliferative HCT116 cells overexpressing *p71-ZER6*, as determined by the EdU incorporation assay. Representative images (left) and the percentage of EdU-positive cells to DAPI positive cells (right) were shown. **c** Colony formation potential of HCT116 cells overexpressing *p71-ZER6*. Representative images (left) and quantification results (right) were shown. Cells transfected with pcCon were used as controls. \*\* $P < 0.01$  (ANOVA).

**Supplementary Table S1.**

Primer pairs used for gene quantification by quantitative PCR.

| <b>Gene</b>     | <b>RefSeq No.</b>                          | <b>Forward (5'-3')</b>  | <b>Reverse (5'-3')</b>  |
|-----------------|--------------------------------------------|-------------------------|-------------------------|
| <i>p21</i>      | NM_000389.4                                | TCACTGTCTTGTACCCTTGTGC  | GGCGTTTGGAGTGGTAGAAA    |
| <i>ZER6</i>     | Common for<br>NM_170686.2 &<br>NM_020781.3 | CCAGAAGGGGAACATAATACAGA | CTGATGTTGAAATACCAGGCTCT |
| <i>p52-ZER6</i> | Specific for<br>NM_020781.3                | TGCGGTCGAAGACGAGAT      | TCCTGCTCTCTCCATGTTCA    |
| <i>p71-ZER6</i> | Specific for<br>NM_170686.2                | GTCCGTGCGGGGAAGGCA      | CCATGGCCCTGCGCTGTCT     |
| <i>β-Actin</i>  | NM_001101.3                                | CGAGCGCGGCTACAGCTT      | TCCTTAATGTCACGCACGATTT  |

## Supplementary Table S2.

Antibodies used for western blotting, immunohistochemistry, immunofluorescence and immunoprecipitation.

| Antibody                                      | Maker                       | Product number | Experiment                                                                            | Dilution                                       |
|-----------------------------------------------|-----------------------------|----------------|---------------------------------------------------------------------------------------|------------------------------------------------|
| anti-β-Actin                                  | Proteintech                 | 60008-1- Ig    | Western Blotting                                                                      | 1/50000                                        |
| anti-ZNF398<br>(anti-ZER6)                    | GeneTex                     | GTX107221      | Western Blotting                                                                      | 1/1000                                         |
| anti-p21                                      | Proteintech                 | 10355-1-AP     | Western Blotting<br>Immunohistochemistry                                              | 1/1000<br>1/50                                 |
| anti-Cyclin D1                                | Santa Cruz<br>Biotechnology | sc-8396        | Western Blotting                                                                      | 1/500                                          |
| anti-Cyclin E                                 | Santa Cruz<br>Biotechnology | sc-481         | Western Blotting                                                                      | 1/300                                          |
| anti-p53                                      | Proteintech                 | 10442-1-AP     | Western Blotting<br>Immunoprecipitation<br>Immunohistochemistry<br>Immunofluorescence | 1/1000<br>5 µg/ml cell lysate<br>1/50<br>1/100 |
| anti-MDM2                                     | Santa Cruz<br>Biotechnology | sc-965         | Western Blotting<br>Immunoprecipitation                                               | 1/100<br>5 µg/ml cell lysate                   |
| anti-FLAG                                     | Sigma-Aldrich               | F1804          | Western Blotting                                                                      | 1/1000                                         |
| anti-FLAG                                     | Proteintech                 | 66008-2-Ig     | Immunoprecipitation<br>Immunofluorescence                                             | 5 µg/ml cell lysate<br>1/100                   |
| anti-Ubiquitin                                | Proteintech                 | 10201-2-AP     | Ubiquitination assay                                                                  | 1/1000                                         |
| Goat Anti-Rabbit IgG                          | ZSGB-BIO                    | ZB2301         | Western Blotting                                                                      | 1/10000                                        |
| Goat Anti-Mouse IgG                           | ZSGB-BIO                    | ZB2305         | Western Blotting                                                                      | 1/10000                                        |
| Alexa Fluor 488 Donkey<br>Anti-rabbit IgG     | Invitrogen                  | A21206         | Immunofluorescence                                                                    | 1/500                                          |
| Alexa Fluor 568 Goat<br>Anti-mouse IgG        | Invitrogen                  | A11004         | Immunofluorescence                                                                    | 1/100                                          |
| Goat Anti-Mouse/Rabbit<br>Immunoglobulins/HRP | DAKO                        | K5007          | Immunohistochemistry                                                                  | not diluted                                    |
| Mouse Anti-Rabbit IgG<br>Light Chain          | Abbkine                     | A25022         | Western Blotting                                                                      | 1/10000                                        |
| Goat Anti-Mouse IgG<br>Light Chain            | Abbkine                     | A25012         | Western Blotting                                                                      | 1/10000                                        |
